# Supplementary material for: Polyketides from a Marine-Derived Fungus Xylariaceae sp
Source: MDPI journal article supplement (doi:10.3390/md11051718), 2013-05-21
Supplement: s2 [file s2]

marinedrugs-11-01718-s001.mol
  corina  04151403573D 1   1.00000     0.00000 
CORINA 3.49 0023  12.04.2013
 26 27  0  0  0  0  0  0  0  0999 V2000
    0.2823    1.8454   -1.1205 C   0  0  0  0  0  0  0  0  0  0  0  0
    0.2111    0.4789   -0.8190 C   0  0  0  0  0  0  0  0  0  0  0  0
    1.3626   -0.2991   -0.8316 C   0  0  0  0  0  0  0  0  0  0  0  0
    2.5784    0.2727   -1.1466 C   0  0  0  0  0  0  0  0  0  0  0  0
    2.6587    1.6248   -1.4445 C   0  0  0  0  0  0  0  0  0  0  0  0
    1.5249    2.4171   -1.4347 C   0  0  0  0  0  0  0  0  0  0  0  0
    1.2456   -1.7620   -0.4891 C   0  0  0  0  0  0  0  0  0  0  0  0
    2.4172   -2.4630   -0.9044 O   0  0  0  0  0  0  0  0  0  0  0  0
    3.6287   -1.8633   -0.4318 C   0  0  0  0  0  0  0  0  0  0  0  0
    3.8433   -0.5481   -1.1824 C   0  0  0  0  0  0  0  0  0  0  0  0
   -0.9346    2.6715   -1.1137 C   0  0  0  0  0  0  0  0  0  0  0  0
   -1.6617    2.8097   -2.2402 O   0  0  0  0  0  0  0  0  0  0  0  0
   -0.9839   -0.0856   -0.5140 O   0  0  0  0  0  0  0  0  0  0  0  0
    0.0246   -2.3520   -1.1975 C   0  0  0  0  0  0  0  0  0  0  0  0
   -0.0780   -3.8219   -0.8815 C   0  0  0  0  0  0  0  0  0  0  0  0
   -1.2026   -4.6406   -1.4612 C   0  0  0  0  0  0  0  0  0  0  0  0
    0.7410   -4.3438   -0.1637 O   0  0  0  0  0  0  0  0  0  0  0  0
   -1.2973   -5.9840    0.6432 C   0  0  0  0  0  0  0  0  0  0  0  0
   -1.1569   -6.0546   -0.8787 C   0  0  0  0  0  0  0  0  0  0  0  0
   -1.2845    3.2296   -0.0922 O   0  0  0  0  0  0  0  0  0  0  0  0
    3.9939    2.2367   -1.7816 C   0  0  0  0  0  0  0  0  0  0  0  0
    1.6135    3.7388   -1.7269 O   0  0  0  0  0  0  0  0  0  0  0  0
    4.2148   -0.8470   -2.6362 C   0  0  0  0  0  0  0  0  0  0  0  0
   -2.3053   -6.8826   -1.4589 C   0  0  0  0  0  0  0  0  0  0  0  0
    0.0894   -6.6679   -1.2142 O   0  0  0  0  0  0  0  0  0  0  0  0
    3.5139   -1.5861    1.0685 C   0  0  0  0  0  0  0  0  0  0  0  0
  1  2  2  0      
  2  3  1  0      
  3  4  2  0      
  4  5  1  0      
  5  6  2  0      
  6  1  1  0      
  3  7  1  0      
  7  8  1  0      
  8  9  1  0      
  9 10  1  0      
 10  4  1  0      
  1 11  1  0      
 11 12  1  0      
 13  2  1  0      
 14 15  1  0      
 15 16  1  0      
 15 17  2  0      
 18 19  1  0      
 19 16  1  0      
 11 20  2  0      
  5 21  1  0      
  6 22  1  0      
 10 23  1  0      
  7 14  1  0      
 19 24  1  0      
 19 25  1  0      
  9 26  1  0      
M  END
$$$$
