# Supplementary material for: Polyketides from a Marine-Derived Fungus Xylariaceae sp
Source: MDPI journal article supplement (doi:10.3390/md11051718), 2013-05-21
Supplement: s3 [file s3]

marinedrugs-11-01718-s001.mol
  ChemDraw02251409342D

 26 27  0  0  0  0  0  0  0  0999 V2000
   -0.7145    2.0072    0.0000 C   0  0  0  0  0  0  0  0  0  0  0  0
   -0.7145    1.1822    0.0000 C   0  0  0  0  0  0  0  0  0  0  0  0
    0.0000    0.7697    0.0000 C   0  0  0  0  0  0  0  0  0  0  0  0
    0.7145    1.1822    0.0000 C   0  0  0  0  0  0  0  0  0  0  0  0
    0.7145    2.0072    0.0000 C   0  0  0  0  0  0  0  0  0  0  0  0
    0.0000    2.4197    0.0000 C   0  0  0  0  0  0  0  0  0  0  0  0
    0.0000   -0.0553    0.0000 C   0  0  0  0  0  0  0  0  0  0  0  0
    0.7145   -0.4678    0.0000 O   0  0  0  0  0  0  0  0  0  0  0  0
    1.4289   -0.0553    0.0000 C   0  0  0  0  0  0  0  0  0  0  0  0
    1.4289    0.7697    0.0000 C   0  0  0  0  0  0  0  0  0  0  0  0
   -1.4289    2.4197    0.0000 C   0  0  0  0  0  0  0  0  0  0  0  0
   -2.1434    2.0072    0.0000 O   0  0  0  0  0  0  0  0  0  0  0  0
   -1.4289    0.7697    0.0000 O   0  0  0  0  0  0  0  0  0  0  0  0
   -0.7145   -0.4678    0.0000 C   0  0  0  0  0  0  0  0  0  0  0  0
   -0.7145   -1.2928    0.0000 C   0  0  0  0  0  0  0  0  0  0  0  0
    0.0000   -1.7053    0.0000 C   0  0  0  0  0  0  0  0  0  0  0  0
   -1.4289   -1.7053    0.0000 O   0  0  0  0  0  0  0  0  0  0  0  0
   -0.7145   -2.9428    0.0000 C   0  0  0  0  0  0  0  0  0  0  0  0
    0.0000   -2.5303    0.0000 C   0  0  0  0  0  0  0  0  0  0  0  0
   -1.4289    3.2447    0.0000 O   0  0  0  0  0  0  0  0  0  0  0  0
    1.4289    2.4197    0.0000 C   0  0  0  0  0  0  0  0  0  0  0  0
    0.0000    3.2447    0.0000 O   0  0  0  0  0  0  0  0  0  0  0  0
    2.1434    1.1822    0.0000 C   0  0  0  0  0  0  0  0  0  0  0  0
    0.8250   -2.5303    0.0000 C   0  0  0  0  0  0  0  0  0  0  0  0
    0.4125   -3.2447    0.0000 O   0  0  0  0  0  0  0  0  0  0  0  0
    2.1434   -0.4678    0.0000 C   0  0  0  0  0  0  0  0  0  0  0  0
  1  2  2  0      
  2  3  1  0      
  3  4  2  0      
  4  5  1  0      
  5  6  2  0      
  6  1  1  0      
  3  7  1  0      
  7  8  1  0      
  8  9  1  0      
  9 10  1  0      
 10  4  1  0      
  1 11  1  0      
 11 12  1  0      
 13  2  1  0      
 14 15  1  0      
 15 16  1  0      
 15 17  2  0      
 18 19  1  0      
 19 16  1  0      
 11 20  2  0      
  5 21  1  0      
  6 22  1  0      
 10 23  1  6      
  7 14  1  6      
 19 24  1  0      
 19 25  1  0      
  9 26  1  1      
M  END
