# Supplementary material for: Polyketides from a Marine-Derived Fungus Xylariaceae sp
Source: MDPI journal article supplement (doi:10.3390/md11051718), 2013-05-21
Supplement: s4 [file s4]

marinedrugs-11-01718-s002.mol
  corina  04151403573D 1   1.00000     0.00000 
CORINA 3.49 0023  12.04.2013
 22 23  0  0  0  0  0  0  0  0999 V2000
   -0.0169    1.3987    0.0097 C   0  0  0  0  0  0  0  0  0  0  0  0
    0.0021   -0.0041    0.0020 C   0  0  0  0  0  0  0  0  0  0  0  0
    1.2106   -0.6852   -0.0144 C   0  0  0  0  0  0  0  0  0  0  0  0
    2.4017    0.0136   -0.1477 C   0  0  0  0  0  0  0  0  0  0  0  0
    2.3931    1.3950   -0.0534 C   0  0  0  0  0  0  0  0  0  0  0  0
    1.1967    2.0956    0.0019 C   0  0  0  0  0  0  0  0  0  0  0  0
    1.2032   -2.1796    0.1877 C   0  0  0  0  0  0  0  0  0  0  0  0
    2.5401   -2.6419    0.4094 O   0  0  0  0  0  0  0  0  0  0  0  0
    3.4298   -2.2124   -0.6231 C   0  0  0  0  0  0  0  0  0  0  0  0
    3.6900   -0.7105   -0.4504 C   0  0  0  0  0  0  0  0  0  0  0  0
   -1.2972    2.1221    0.0198 C   0  0  0  0  0  0  0  0  0  0  0  0
   -1.8895    2.4599   -1.1429 O   0  0  0  0  0  0  0  0  0  0  0  0
   -1.1821   -0.6667   -0.0326 O   0  0  0  0  0  0  0  0  0  0  0  0
    0.3810   -2.5344    1.4312 C   0  0  0  0  0  0  0  0  0  0  0  0
    0.2775   -4.0328    1.5544 C   0  0  0  0  0  0  0  0  0  0  0  0
   -0.4853   -4.6437    2.7015 C   0  0  0  0  0  0  0  0  0  0  0  0
    0.8060   -4.7439    0.7338 O   0  0  0  0  0  0  0  0  0  0  0  0
   -1.8213    2.4153    1.0765 O   0  0  0  0  0  0  0  0  0  0  0  0
    3.6660    2.1955    0.0731 C   0  0  0  0  0  0  0  0  0  0  0  0
    1.2099    3.4515    0.0476 O   0  0  0  0  0  0  0  0  0  0  0  0
    4.2646   -0.2160   -1.7881 C   0  0  0  0  0  0  0  0  0  0  0  0
    4.7530   -2.9729   -0.5166 C   0  0  0  0  0  0  0  0  0  0  0  0
  1  2  2  0      
  2  3  1  0      
  3  4  2  0      
  4  5  1  0      
  5  6  2  0      
  6  1  1  0      
  3  7  1  0      
  7  8  1  0      
  8  9  1  0      
  9 10  1  0      
 10  4  1  0      
  1 11  1  0      
 11 12  1  0      
 13  2  1  0      
 14 15  1  0      
 15 16  1  0      
 15 17  2  0      
 11 18  2  0      
  5 19  1  0      
  6 20  1  0      
 10 21  1  0      
  9 22  1  0      
  7 14  1  4      
M  END
$$$$
