# Supplementary material for: Polyketides from a Marine-Derived Fungus Xylariaceae sp
Source: MDPI journal article supplement (doi:10.3390/md11051718), 2013-05-21
Supplement: s5 [file s5]

marinedrugs-11-01718-s002.mol
  ChemDraw02251409352D

 22 23  0  0  0  0  0  0  0  0999 V2000
   -0.7145    1.2375    0.0000 C   0  0  0  0  0  0  0  0  0  0  0  0
   -0.7145    0.4125    0.0000 C   0  0  0  0  0  0  0  0  0  0  0  0
    0.0000   -0.0000    0.0000 C   0  0  0  0  0  0  0  0  0  0  0  0
    0.7145    0.4125    0.0000 C   0  0  0  0  0  0  0  0  0  0  0  0
    0.7145    1.2375    0.0000 C   0  0  0  0  0  0  0  0  0  0  0  0
    0.0000    1.6500    0.0000 C   0  0  0  0  0  0  0  0  0  0  0  0
    0.0000   -0.8250    0.0000 C   0  0  0  0  0  0  0  0  0  0  0  0
    0.7145   -1.2375    0.0000 O   0  0  0  0  0  0  0  0  0  0  0  0
    1.4289   -0.8250    0.0000 C   0  0  0  0  0  0  0  0  0  0  0  0
    1.4289   -0.0000    0.0000 C   0  0  0  0  0  0  0  0  0  0  0  0
   -1.4289    1.6500    0.0000 C   0  0  0  0  0  0  0  0  0  0  0  0
   -2.1434    1.2375    0.0000 O   0  0  0  0  0  0  0  0  0  0  0  0
   -1.4289   -0.0000    0.0000 O   0  0  0  0  0  0  0  0  0  0  0  0
   -0.7145   -1.2375    0.0000 C   0  0  0  0  0  0  0  0  0  0  0  0
   -0.7145   -2.0625    0.0000 C   0  0  0  0  0  0  0  0  0  0  0  0
    0.0000   -2.4750    0.0000 C   0  0  0  0  0  0  0  0  0  0  0  0
   -1.4289   -2.4750    0.0000 O   0  0  0  0  0  0  0  0  0  0  0  0
   -1.4289    2.4750    0.0000 O   0  0  0  0  0  0  0  0  0  0  0  0
    1.4289    1.6500    0.0000 C   0  0  0  0  0  0  0  0  0  0  0  0
    0.0000    2.4750    0.0000 O   0  0  0  0  0  0  0  0  0  0  0  0
    2.1434    0.4125    0.0000 C   0  0  0  0  0  0  0  0  0  0  0  0
    2.1434   -1.2375    0.0000 C   0  0  0  0  0  0  0  0  0  0  0  0
  1  2  2  0      
  2  3  1  0      
  3  4  2  0      
  4  5  1  0      
  5  6  2  0      
  6  1  1  0      
  3  7  1  0      
  7  8  1  0      
  8  9  1  0      
  9 10  1  0      
 10  4  1  0      
  1 11  1  0      
 11 12  1  0      
 13  2  1  0      
 14 15  1  0      
 15 16  1  0      
 15 17  2  0      
 11 18  2  0      
  5 19  1  0      
  6 20  1  0      
 10 21  1  6      
  9 22  1  1      
  7 14  1  4      
M  END
