# Supplementary material for: Polyketides from a Marine-Derived Fungus Xylariaceae sp
Source: MDPI journal article supplement (doi:10.3390/md11051718), 2013-05-21
Supplement: s6 [file s6]

marinedrugs-11-01718-s003.mol
  corina  04151403573D 1   1.00000     0.00000 
CORINA 3.49 0023  12.04.2013
 19 20  0  0  0  0  0  0  0  0999 V2000
   -0.0169    1.3975    0.0097 C   0  0  0  0  0  0  0  0  0  0  0  0
    0.0021   -0.0041    0.0020 C   0  0  0  0  0  0  0  0  0  0  0  0
    1.2300   -0.6756   -0.0141 C   0  0  0  0  0  0  0  0  0  0  0  0
    2.4298    0.0446   -0.0258 C   0  0  0  0  0  0  0  0  0  0  0  0
    2.4041    1.4226   -0.0160 C   0  0  0  0  0  0  0  0  0  0  0  0
    1.1954    2.1056    0.0020 C   0  0  0  0  0  0  0  0  0  0  0  0
    1.2689   -2.1510   -0.0139 C   0  0  0  0  0  0  0  0  0  0  0  0
    2.4725   -2.7402   -0.2327 O   0  0  0  0  0  0  0  0  0  0  0  0
    3.5886   -2.1073    0.4581 C   0  0  0  0  0  0  0  0  0  0  0  0
    3.7528   -0.6762   -0.0544 C   0  0  0  0  0  0  0  0  0  0  0  0
   -1.1575   -0.7024    0.0105 O   0  0  0  0  0  0  0  0  0  0  0  0
    3.6985    2.1943   -0.0242 C   0  0  0  0  0  0  0  0  0  0  0  0
    1.1858    3.4601    0.0125 O   0  0  0  0  0  0  0  0  0  0  0  0
    4.2803   -0.7098   -1.4902 C   0  0  0  0  0  0  0  0  0  0  0  0
    3.3104   -2.0824    1.9624 C   0  0  0  0  0  0  0  0  0  0  0  0
    0.2657   -2.8109    0.1745 O   0  0  0  0  0  0  0  0  0  0  0  0
   -1.2976    2.1211    0.0197 C   0  0  0  0  0  0  0  0  0  0  0  0
   -1.8217    2.4143    1.0765 O   0  0  0  0  0  0  0  0  0  0  0  0
   -1.8899    2.4590   -1.1429 O   0  0  0  0  0  0  0  0  0  0  0  0
  1  2  2  0      
  2  3  1  0      
  3  4  2  0      
  4  5  1  0      
  5  6  2  0      
  6  1  1  0      
  3  7  1  0      
  7  8  1  0      
  8  9  1  0      
  9 10  1  0      
 10  4  1  0      
 11  2  1  0      
  5 12  1  0      
  6 13  1  0      
 10 14  1  0      
  9 15  1  0      
  7 16  2  0      
  1 17  1  0      
 17 18  2  0      
 17 19  1  0      
M  STY  1   1 SUP
M  SLB  1   1   1
M  SAL   1  3  17  18  19
M  SBL   1  1  18
M  SMT   1 COOH
M  SBV   1 18   -8.5525    6.0431
M  END
$$$$
