# Supplementary material for: Polyketides from a Marine-Derived Fungus Xylariaceae sp
Source: MDPI journal article supplement (doi:10.3390/md11051718), 2013-05-21
Supplement: s7 [file s7]

marinedrugs-11-01718-s003.mol
  ChemDraw02251409362D

 19 20  0  0  0  0  0  0  0  0999 V2000
   -0.7139    0.6188    0.0000 C   0  0  0  0  0  0  0  0  0  0  0  0
   -0.7139   -0.2062    0.0000 C   0  0  0  0  0  0  0  0  0  0  0  0
    0.0005   -0.6188    0.0000 C   0  0  0  0  0  0  0  0  0  0  0  0
    0.7150   -0.2062    0.0000 C   0  0  0  0  0  0  0  0  0  0  0  0
    0.7150    0.6188    0.0000 C   0  0  0  0  0  0  0  0  0  0  0  0
    0.0005    1.0313    0.0000 C   0  0  0  0  0  0  0  0  0  0  0  0
    0.0005   -1.4438    0.0000 C   0  0  0  0  0  0  0  0  0  0  0  0
    0.7150   -1.8562    0.0000 O   0  0  0  0  0  0  0  0  0  0  0  0
    1.4295   -1.4438    0.0000 C   0  0  0  0  0  0  0  0  0  0  0  0
    1.4295   -0.6188    0.0000 C   0  0  0  0  0  0  0  0  0  0  0  0
   -1.4284   -0.6188    0.0000 O   0  0  0  0  0  0  0  0  0  0  0  0
    1.4295    1.0313    0.0000 C   0  0  0  0  0  0  0  0  0  0  0  0
    0.0005    1.8563    0.0000 O   0  0  0  0  0  0  0  0  0  0  0  0
    2.1439   -0.2062    0.0000 C   0  0  0  0  0  0  0  0  0  0  0  0
    2.1439   -1.8563    0.0000 C   0  0  0  0  0  0  0  0  0  0  0  0
   -0.7139   -1.8563    0.0000 O   0  0  0  0  0  0  0  0  0  0  0  0
   -1.4295    1.0313    0.0000 C   0  0  0  0  0  0  0  0  0  0  0  0
   -1.4295    1.8563    0.0000 O   0  0  0  0  0  0  0  0  0  0  0  0
   -2.1439    0.6188    0.0000 O   0  0  0  0  0  0  0  0  0  0  0  0
  1  2  2  0      
  2  3  1  0      
  3  4  2  0      
  4  5  1  0      
  5  6  2  0      
  6  1  1  0      
  3  7  1  0      
  7  8  1  0      
  8  9  1  0      
  9 10  1  0      
 10  4  1  0      
 11  2  1  0      
  5 12  1  0      
  6 13  1  0      
 10 14  1  6      
  9 15  1  1      
  7 16  2  0      
  1 17  1  0      
 17 18  2  0      
 17 19  1  0      
M  STY  1   1 SUP
M  SLB  1   1   1
M  SAL   1  3  17  18  19
M  SBL   1  1  18
M  SMT   1 COOH
M  SBV   1 18   -8.5525    6.0431
M  END
