# Supplementary material for: Polyketides from a Marine-Derived Fungus Xylariaceae sp
Source: MDPI journal article supplement (doi:10.3390/md11051718), 2013-05-21
Supplement: s8 [file s8]

marinedrugs-11-01718-s004.mol
  corina  04151403573D 1   1.00000     0.00000 
CORINA 3.49 0023  12.04.2013
 28 32  0  0  0  0  0  0  0  0999 V2000
    0.4507    1.2822   -0.5210 C   0  0  0  0  0  0  0  0  0  0  0  0
    0.7761   -0.0774   -0.5449 C   0  0  0  0  0  0  0  0  0  0  0  0
    2.1248   -0.4695   -0.6229 C   0  0  0  0  0  0  0  0  0  0  0  0
    3.1388    0.5047   -0.6793 C   0  0  0  0  0  0  0  0  0  0  0  0
    2.7952    1.8433   -0.6507 C   0  0  0  0  0  0  0  0  0  0  0  0
    1.4675    2.2222   -0.5689 C   0  0  0  0  0  0  0  0  0  0  0  0
   -0.2093   -1.0007   -0.4933 O   0  0  0  0  0  0  0  0  0  0  0  0
    0.0564   -2.3236   -0.5256 C   0  0  0  0  0  0  0  0  0  0  0  0
    1.3920   -2.7822   -0.5946 C   0  0  0  0  0  0  0  0  0  0  0  0
    2.4450   -1.8482   -0.6448 C   0  0  0  0  0  0  0  0  0  0  0  0
   -0.9716   -3.2446   -0.4943 C   0  0  0  0  0  0  0  0  0  0  0  0
   -0.6813   -4.6134   -0.5253 C   0  0  0  0  0  0  0  0  0  0  0  0
    0.6547   -5.0593   -0.5847 C   0  0  0  0  0  0  0  0  0  0  0  0
    1.6705   -4.1631   -0.6159 C   0  0  0  0  0  0  0  0  0  0  0  0
    3.1049   -4.6274   -0.6690 C   0  0  0  0  0  0  0  0  0  0  0  0
    3.9482   -3.5524   -1.3643 C   0  0  0  0  0  0  0  0  0  0  0  0
    3.7198   -2.2713   -0.7132 O   0  0  0  0  0  0  0  0  0  0  0  0
    0.8117    3.5895   -0.5035 C   0  0  0  0  0  0  0  0  0  0  0  0
   -0.6156    3.2382   -0.0220 C   0  0  0  0  0  0  0  0  0  0  0  0
   -0.7739    1.8798   -0.4644 O   0  0  0  0  0  0  0  0  0  0  0  0
   -1.6510    4.1492   -0.6844 C   0  0  0  0  0  0  0  0  0  0  0  0
    1.5239    4.4894    0.5084 C   0  0  0  0  0  0  0  0  0  0  0  0
    3.8727    2.8952   -0.7097 C   0  0  0  0  0  0  0  0  0  0  0  0
    4.4416    0.1335   -0.7603 O   0  0  0  0  0  0  0  0  0  0  0  0
    3.6255   -4.8471    0.7528 C   0  0  0  0  0  0  0  0  0  0  0  0
    0.9537   -6.5361   -0.6130 C   0  0  0  0  0  0  0  0  0  0  0  0
   -1.5951   -5.4301   -0.5002 O   0  0  0  0  0  0  0  0  0  0  0  0
    3.5424   -3.4572   -2.8365 C   0  0  0  0  0  0  0  0  0  0  0  0
  1  2  1  0      
  2  3  2  0      
  3  4  1  0      
  4  5  2  0      
  5  6  1  0      
  6  1  2  0      
  2  7  1  0      
  7  8  1  0      
  8  9  1  0      
  9 10  2  0      
 10  3  1  0      
  8 11  2  0      
 11 12  1  0      
 12 13  1  0      
 13 14  2  0      
 14  9  1  0      
 14 15  1  0      
 15 16  1  0      
 16 17  1  0      
 17 10  1  0      
  6 18  1  0      
 18 19  1  0      
 19 20  1  0      
 20  1  1  0      
 19 21  1  0      
 18 22  1  0      
  5 23  1  0      
  4 24  1  0      
 15 25  1  0      
 13 26  1  0      
 12 27  2  0      
 16 28  1  0      
M  END
$$$$
