# Supplementary material for: Polyketides from a Marine-Derived Fungus Xylariaceae sp
Source: MDPI journal article supplement (doi:10.3390/md11051718), 2013-05-21
Supplement: s9 [file s9]

marinedrugs-11-01718-s004.mol
  ChemDraw02251409362D

 28 32  0  0  0  0  0  0  0  0999 V2000
   -0.0412    1.3242    0.0000 C   0  0  0  0  0  0  0  0  0  0  0  0
   -0.0412    0.4992    0.0000 C   0  0  0  0  0  0  0  0  0  0  0  0
    0.6733    0.0867    0.0000 C   0  0  0  0  0  0  0  0  0  0  0  0
    1.3877    0.4992    0.0000 C   0  0  0  0  0  0  0  0  0  0  0  0
    1.3877    1.3242    0.0000 C   0  0  0  0  0  0  0  0  0  0  0  0
    0.6733    1.7367    0.0000 C   0  0  0  0  0  0  0  0  0  0  0  0
   -0.7557    0.0867    0.0000 O   0  0  0  0  0  0  0  0  0  0  0  0
   -0.7557   -0.7383    0.0000 C   0  0  0  0  0  0  0  0  0  0  0  0
   -0.0412   -1.1508    0.0000 C   0  0  0  0  0  0  0  0  0  0  0  0
    0.6733   -0.7383    0.0000 C   0  0  0  0  0  0  0  0  0  0  0  0
   -1.4702   -1.1508    0.0000 C   0  0  0  0  0  0  0  0  0  0  0  0
   -1.4702   -1.9758    0.0000 C   0  0  0  0  0  0  0  0  0  0  0  0
   -0.7557   -2.3883    0.0000 C   0  0  0  0  0  0  0  0  0  0  0  0
   -0.0412   -1.9758    0.0000 C   0  0  0  0  0  0  0  0  0  0  0  0
    0.6733   -2.3883    0.0000 C   0  0  0  0  0  0  0  0  0  0  0  0
    1.3877   -1.9758    0.0000 C   0  0  0  0  0  0  0  0  0  0  0  0
    1.3877   -1.1508    0.0000 O   0  0  0  0  0  0  0  0  0  0  0  0
    0.5017    2.5437    0.0000 C   0  0  0  0  0  0  0  0  0  0  0  0
   -0.3187    2.6299    0.0000 C   0  0  0  0  0  0  0  0  0  0  0  0
   -0.6543    1.8762    0.0000 O   0  0  0  0  0  0  0  0  0  0  0  0
   -0.9021    3.2133    0.0000 C   0  0  0  0  0  0  0  0  0  0  0  0
    1.0851    3.1270    0.0000 C   0  0  0  0  0  0  0  0  0  0  0  0
    2.1022    1.7367    0.0000 C   0  0  0  0  0  0  0  0  0  0  0  0
    2.1846    0.2857    0.0000 O   0  0  0  0  0  0  0  0  0  0  0  0
    0.6733   -3.2133    0.0000 C   0  0  0  0  0  0  0  0  0  0  0  0
   -0.7557   -3.2133    0.0000 C   0  0  0  0  0  0  0  0  0  0  0  0
   -2.1846   -2.3883    0.0000 O   0  0  0  0  0  0  0  0  0  0  0  0
    2.1022   -2.3883    0.0000 C   0  0  0  0  0  0  0  0  0  0  0  0
  1  2  1  0      
  2  3  2  0      
  3  4  1  0      
  4  5  2  0      
  5  6  1  0      
  6  1  2  0      
  2  7  1  0      
  7  8  1  0      
  8  9  1  0      
  9 10  2  0      
 10  3  1  0      
  8 11  2  0      
 11 12  1  0      
 12 13  1  0      
 13 14  2  0      
 14  9  1  0      
 14 15  1  0      
 15 16  1  0      
 16 17  1  0      
 17 10  1  0      
  6 18  1  0      
 18 19  1  0      
 19 20  1  0      
 20  1  1  0      
 19 21  1  6      
 18 22  1  1      
  5 23  1  0      
  4 24  1  0      
 15 25  1  1      
 13 26  1  0      
 12 27  2  0      
 16 28  1  6      
M  END
