# Supplementary material for: Polyketides from a Marine-Derived Fungus Xylariaceae sp
Source: MDPI journal article supplement (doi:10.3390/md11051718), 2013-05-21
Supplement: s10 [file s10]

marinedrugs-11-01718-s005.mol
  corina  04151403573D 1   1.00000     0.00000 
CORINA 3.49 0023  12.04.2013
 18 18  0  0  0  0  0  0  0  0999 V2000
   -0.0689    1.2228   -0.2429 C   0  0  0  0  0  0  0  0  0  0  0  0
    0.1241   -0.1459   -0.2445 C   0  0  0  0  0  0  0  0  0  0  0  0
    1.3786   -0.6779   -0.0097 C   0  0  0  0  0  0  0  0  0  0  0  0
    2.4571    0.1576    0.2299 C   0  0  0  0  0  0  0  0  0  0  0  0
    2.2729    1.5488    0.2334 C   0  0  0  0  0  0  0  0  0  0  0  0
    0.9956    2.0775   -0.0060 C   0  0  0  0  0  0  0  0  0  0  0  0
    0.8036    3.4203   -0.0059 O   0  0  0  0  0  0  0  0  0  0  0  0
    3.6866   -0.3669    0.4608 O   0  0  0  0  0  0  0  0  0  0  0  0
    1.5732   -2.1723   -0.0141 C   0  0  0  0  0  0  0  0  0  0  0  0
   -1.0522    1.6277   -0.4315 H   0  0  0  0  0  0  0  0  0  0  0  0
   -1.0415   -1.0652   -0.5034 C   0  0  0  0  0  0  0  0  0  0  0  0
   -2.0472   -0.9492    0.6438 C   0  0  0  0  0  0  0  0  0  0  0  0
   -1.7193   -0.6718   -1.8175 C   0  0  0  0  0  0  0  0  0  0  0  0
   -1.3695   -1.3427    1.9579 C   0  0  0  0  0  0  0  0  0  0  0  0
   -2.5141    0.3984    0.7335 O   0  0  0  0  0  0  0  0  0  0  0  0
    3.4105    2.4461    0.4871 C   0  0  0  0  0  0  0  0  0  0  0  0
    4.0870    2.8467   -0.4398 O   0  0  0  0  0  0  0  0  0  0  0  0
    3.7027    2.8240    1.7474 O   0  0  0  0  0  0  0  0  0  0  0  0
  1  2  2  0      
  2  3  1  0      
  3  4  2  0      
  4  5  1  0      
  5  6  2  0      
  6  1  1  0      
  6  7  1  0      
  4  8  1  0      
  3  9  1  0      
  1 10  1  0      
  2 11  1  0      
 11 12  1  0      
 11 13  1  0      
 12 14  1  0      
 12 15  1  0      
  5 16  1  0      
 16 17  2  0      
 16 18  1  0      
M  STY  1   1 SUP
M  SLB  1   1   1
M  SAL   1  3  16  17  18
M  SBL   1  1  16
M  SMT   1 COOH
M  SBV   1 16   -6.6422    4.5581
M  END
$$$$
