# Supplementary material for: Polyketides from a Marine-Derived Fungus Xylariaceae sp
Source: MDPI journal article supplement (doi:10.3390/md11051718), 2013-05-21
Supplement: s11 [file s11]

marinedrugs-11-01718-s005.mol
  ChemDraw02251409372D

 18 18  0  0  0  0  0  0  0  0999 V2000
   -0.3571    0.4125    0.0000 C   0  0  0  0  0  0  0  0  0  0  0  0
   -0.3571   -0.4125    0.0000 C   0  0  0  0  0  0  0  0  0  0  0  0
    0.3574   -0.8250    0.0000 C   0  0  0  0  0  0  0  0  0  0  0  0
    1.0719   -0.4125    0.0000 C   0  0  0  0  0  0  0  0  0  0  0  0
    1.0719    0.4125    0.0000 C   0  0  0  0  0  0  0  0  0  0  0  0
    0.3574    0.8250    0.0000 C   0  0  0  0  0  0  0  0  0  0  0  0
    0.3574    1.6500    0.0000 O   0  0  0  0  0  0  0  0  0  0  0  0
    1.7863   -0.8250    0.0000 O   0  0  0  0  0  0  0  0  0  0  0  0
    0.3574   -1.6500    0.0000 C   0  0  0  0  0  0  0  0  0  0  0  0
   -1.0715    0.8250    0.0000 H   0  0  0  0  0  0  0  0  0  0  0  0
   -1.0715   -0.8250    0.0000 C   0  0  0  0  0  0  0  0  0  0  0  0
   -1.7860   -0.4125    0.0000 C   0  0  0  0  0  0  0  0  0  0  0  0
   -1.0715   -1.6500    0.0000 C   0  0  0  0  0  0  0  0  0  0  0  0
   -2.5005   -0.8250    0.0000 C   0  0  0  0  0  0  0  0  0  0  0  0
   -1.7860    0.4125    0.0000 O   0  0  0  0  0  0  0  0  0  0  0  0
    1.7860    0.8250    0.0000 C   0  0  0  0  0  0  0  0  0  0  0  0
    1.7860    1.6500    0.0000 O   0  0  0  0  0  0  0  0  0  0  0  0
    2.5005    0.4125    0.0000 O   0  0  0  0  0  0  0  0  0  0  0  0
  1  2  2  0      
  2  3  1  0      
  3  4  2  0      
  4  5  1  0      
  5  6  2  0      
  6  1  1  0      
  6  7  1  0      
  4  8  1  0      
  3  9  1  0      
  1 10  1  0      
  2 11  1  0      
 11 12  1  0      
 11 13  1  6      
 12 14  1  1      
 12 15  1  0      
  5 16  1  0      
 16 17  2  0      
 16 18  1  0      
M  STY  1   1 SUP
M  SLB  1   1   1
M  SAL   1  3  16  17  18
M  SBL   1  1  16
M  SMT   1 COOH
M  SBV   1 16   -6.6422    4.5581
M  END
