# Supplementary material for: Polyketides from a Marine-Derived Fungus Xylariaceae sp
Source: MDPI journal article supplement (doi:10.3390/md11051718), 2013-05-21
Supplement: s12 [file s12]

marinedrugs-11-01718-s006.mol
  corina  04151403583D 1   1.00000     0.00000 
CORINA 3.49 0023  12.04.2013
 11 11  0  0  0  0  0  0  0  0999 V2000
   -0.0184    1.5087    0.0103 C   0  0  0  0  0  0  0  0  0  0  0  0
    0.0021   -0.0041    0.0020 C   0  0  0  0  0  0  0  0  0  0  0  0
    1.5012   -0.3569   -0.0142 C   0  0  0  0  0  0  0  0  0  0  0  0
    2.2074    0.9784   -0.0138 C   0  0  0  0  0  0  0  0  0  0  0  0
    1.3033    1.9693    0.0002 C   0  0  0  0  0  0  0  0  0  0  0  0
   -1.0134    2.2056    0.0191 O   0  0  0  0  0  0  0  0  0  0  0  0
    1.8742   -1.1580    1.2348 C   0  0  0  0  0  0  0  0  0  0  0  0
    3.2384   -1.5740    1.1441 O   0  0  0  0  0  0  0  0  0  0  0  0
    4.0336    2.5152   -0.0224 C   0  0  0  0  0  0  0  0  0  0  0  0
    3.5431    1.1485   -0.0249 O   0  0  0  0  0  0  0  0  0  0  0  0
   -0.6893   -0.5429   -1.2520 C   0  0  0  0  0  0  0  0  0  0  0  0
  1  2  1  0      
  2  3  1  0      
  3  4  1  0      
  4  5  2  0      
  5  1  1  0      
  1  6  2  0      
  7  8  1  0      
  9 10  1  0      
 10  4  1  0      
  3  7  1  0      
  2 11  1  0      
M  END
$$$$
