# Supplementary material for: Polyketides from a Marine-Derived Fungus Xylariaceae sp
Source: MDPI journal article supplement (doi:10.3390/md11051718), 2013-05-21
Supplement: s13 [file s13]

marinedrugs-11-01718-s006.mol
  ChemDraw02251409372D

 11 11  0  0  0  0  0  0  0  0999 V2000
   -0.8948    0.6855    0.0000 C   0  0  0  0  0  0  0  0  0  0  0  0
   -0.8085   -0.1350    0.0000 C   0  0  0  0  0  0  0  0  0  0  0  0
   -0.0016   -0.3066    0.0000 C   0  0  0  0  0  0  0  0  0  0  0  0
    0.4109    0.4079    0.0000 C   0  0  0  0  0  0  0  0  0  0  0  0
   -0.1411    1.0210    0.0000 C   0  0  0  0  0  0  0  0  0  0  0  0
   -1.6484    1.0210    0.0000 O   0  0  0  0  0  0  0  0  0  0  0  0
    0.4109   -1.0210    0.0000 C   0  0  0  0  0  0  0  0  0  0  0  0
    1.2359   -1.0210    0.0000 O   0  0  0  0  0  0  0  0  0  0  0  0
    1.6484   -0.3066    0.0000 C   0  0  0  0  0  0  0  0  0  0  0  0
    1.2359    0.4079    0.0000 O   0  0  0  0  0  0  0  0  0  0  0  0
   -1.3919   -0.7184    0.0000 C   0  0  0  0  0  0  0  0  0  0  0  0
  1  2  1  0      
  2  3  1  0      
  3  4  1  0      
  4  5  2  0      
  5  1  1  0      
  1  6  2  0      
  7  8  1  0      
  9 10  1  0      
 10  4  1  0      
  3  7  1  1      
  2 11  1  6      
M  END
