# Supplementary material for: Polyketides from a Marine-Derived Fungus Xylariaceae sp
Source: MDPI journal article supplement (doi:10.3390/md11051718), 2013-05-21
Supplement: s14 [file s14]

marinedrugs-11-01718-s007.mol
  corina  04151403583D 1   1.00000     0.00000 
CORINA 3.49 0023  12.04.2013
 27 29  0  0  0  0  0  0  0  0999 V2000
   -0.0168    1.3876    0.0097 C   0  0  0  0  0  0  0  0  0  0  0  0
    0.0021   -0.0041    0.0020 C   0  0  0  0  0  0  0  0  0  0  0  0
    1.1951   -0.6920   -0.0131 C   0  0  0  0  0  0  0  0  0  0  0  0
    2.4075    0.0246   -0.0208 C   0  0  0  0  0  0  0  0  0  0  0  0
    2.3779    1.4407   -0.0130 C   0  0  0  0  0  0  0  0  0  0  0  0
    1.1400    2.1056    0.0025 C   0  0  0  0  0  0  0  0  0  0  0  0
    3.6493   -0.6406   -0.0357 C   0  0  0  0  0  0  0  0  0  0  0  0
    4.8121    0.0965   -0.0425 C   0  0  0  0  0  0  0  0  0  0  0  0
    4.7728    1.4882   -0.0348 C   0  0  0  0  0  0  0  0  0  0  0  0
    3.5874    2.1571   -0.0203 C   0  0  0  0  0  0  0  0  0  0  0  0
    3.6989   -1.9976   -0.0429 O   0  0  0  0  0  0  0  0  0  0  0  0
    1.2024   -2.0499   -0.0200 O   0  0  0  0  0  0  0  0  0  0  0  0
    0.1845   -4.3516    2.3456 C   0  0  0  0  0  0  0  0  0  0  0  0
    0.9319   -4.7255    1.0619 C   0  0  0  0  0  0  0  0  0  0  0  0
    0.1375   -4.2167   -0.1449 C   0  0  0  0  0  0  0  0  0  0  0  0
   -0.0673   -2.7055   -0.0109 C   0  0  0  0  0  0  0  0  0  0  0  0
   -0.7400   -2.4244    1.2181 O   0  0  0  0  0  0  0  0  0  0  0  0
   -0.0221   -2.8352    2.3834 C   0  0  0  0  0  0  0  0  0  0  0  0
    0.8610   -4.4960   -1.3451 O   0  0  0  0  0  0  0  0  0  0  0  0
   -0.8207   -2.4600    3.6334 C   0  0  0  0  0  0  0  0  0  0  0  0
   -1.0851   -5.0072    2.3672 O   0  0  0  0  0  0  0  0  0  0  0  0
    1.0646   -6.1461    0.9824 O   0  0  0  0  0  0  0  0  0  0  0  0
    4.9950   -2.5994   -0.0580 C   0  0  0  0  0  0  0  0  0  0  0  0
   -0.9162   -1.0145    3.7309 O   0  0  0  0  0  0  0  0  0  0  0  0
   -2.0847   -1.2660    5.5896 O   0  0  0  0  0  0  0  0  0  0  0  0
   -1.5906   -0.5177    4.7798 C   0  0  0  0  0  0  0  0  0  0  0  0
   -1.7315    0.9733    4.9473 C   0  0  0  0  0  0  0  0  0  0  0  0
  1  2  2  0      
  2  3  1  0      
  3  4  2  0      
  4  5  1  0      
  5  6  2  0      
  6  1  1  0      
  4  7  1  0      
  7  8  2  0      
  8  9  1  0      
  9 10  2  0      
 10  5  1  0      
  7 11  1  0      
  3 12  1  0      
 16 17  1  0      
 17 18  1  0      
 18 13  1  0      
 12 16  1  0      
 15 19  1  0      
 18 20  1  0      
 13 21  1  0      
 14 22  1  0      
 16 15  1  0      
 15 14  1  0      
 14 13  1  0      
 11 23  1  0      
 20 24  1  0      
 24 26  1  0      
 25 26  2  0      
 26 27  1  0      
M  STY  1   1 SUP
M  SLB  1   1   1
M  SAL   1  4  24  25  26  27
M  SBL   1  1  26
M  SMT   1 OAc
M  SBV   1 26   -8.1928    6.0139
M  END
$$$$
