# Supplementary material for: Polyketides from a Marine-Derived Fungus Xylariaceae sp
Source: MDPI journal article supplement (doi:10.3390/md11051718), 2013-05-21
Supplement: s15 [file s15]

marinedrugs-11-01718-s007.mol
  ChemDraw04151415512D

 27 29  0  0  0  0  0  0  0  0999 V2000
    0.2463    1.2312    0.0000 C   0  0  0  0  0  0  0  0  0  0  0  0
    0.2463    0.4062    0.0000 C   0  0  0  0  0  0  0  0  0  0  0  0
    0.9608   -0.0063    0.0000 C   0  0  0  0  0  0  0  0  0  0  0  0
    1.6752    0.4062    0.0000 C   0  0  0  0  0  0  0  0  0  0  0  0
    1.6752    1.2312    0.0000 C   0  0  0  0  0  0  0  0  0  0  0  0
    0.9608    1.6437    0.0000 C   0  0  0  0  0  0  0  0  0  0  0  0
    2.3897   -0.0063    0.0000 C   0  0  0  0  0  0  0  0  0  0  0  0
    3.1042    0.4062    0.0000 C   0  0  0  0  0  0  0  0  0  0  0  0
    3.1042    1.2312    0.0000 C   0  0  0  0  0  0  0  0  0  0  0  0
    2.3897    1.6437    0.0000 C   0  0  0  0  0  0  0  0  0  0  0  0
    2.3897   -0.8313    0.0000 O   0  0  0  0  0  0  0  0  0  0  0  0
    0.9608   -0.8313    0.0000 O   0  0  0  0  0  0  0  0  0  0  0  0
   -1.9026   -1.0643    0.0000 C   0  0  0  0  0  0  0  0  0  0  0  0
   -1.3153   -1.6437    0.0000 C   0  0  0  0  0  0  0  0  0  0  0  0
   -0.6013   -1.2303    0.0000 C   0  0  0  0  0  0  0  0  0  0  0  0
    0.2189   -1.2213    0.0000 C   0  0  0  0  0  0  0  0  0  0  0  0
   -0.3683   -0.6419    0.0000 O   0  0  0  0  0  0  0  0  0  0  0  0
   -1.0824   -1.0553    0.0000 C   0  0  0  0  0  0  0  0  0  0  0  0
    0.1131   -1.6428    0.0000 O   0  0  0  0  0  0  0  0  0  0  0  0
   -0.9055   -0.2974    0.0000 C   0  0  0  0  0  0  0  0  0  0  0  0
   -2.6171   -1.4768    0.0000 O   0  0  0  0  0  0  0  0  0  0  0  0
   -2.1403   -1.6437    0.0000 O   0  0  0  0  0  0  0  0  0  0  0  0
    3.1042   -1.2438    0.0000 C   0  0  0  0  0  0  0  0  0  0  0  0
   -1.6753   -0.5036    0.0000 O   0  0  0  0  0  0  0  0  0  0  0  0
   -2.3897    0.7339    0.0000 O   0  0  0  0  0  0  0  0  0  0  0  0
   -2.3897   -0.0911    0.0000 C   0  0  0  0  0  0  0  0  0  0  0  0
   -3.1042   -0.5036    0.0000 C   0  0  0  0  0  0  0  0  0  0  0  0
  1  2  2  0      
  2  3  1  0      
  3  4  2  0      
  4  5  1  0      
  5  6  2  0      
  6  1  1  0      
  4  7  1  0      
  7  8  2  0      
  8  9  1  0      
  9 10  2  0      
 10  5  1  0      
  7 11  1  0      
  3 12  1  0      
 16 17  1  0      
 17 18  1  0      
 18 13  1  0      
 12 16  1  0      
 15 19  1  0      
 18 20  1  0      
 13 21  1  0      
 14 22  1  0      
 16 15  1  1      
 15 14  1  1      
 14 13  1  1      
 11 23  1  0      
 20 24  1  0      
 24 26  1  0      
 25 26  2  0      
 26 27  1  0      
M  STY  1   1 SUP
M  SLB  1   1   1
M  SAL   1  4  24  25  26  27
M  SBL   1  1  26
M  SMT   1 OAc
M  SBV   1 26   -8.1928    6.0139
M  END
