# Supplementary material for: Polyketides from a Marine-Derived Fungus Xylariaceae sp
Source: MDPI journal article supplement (doi:10.3390/md11051718), 2013-05-21
Supplement: s16 [file s16]

marinedrugs-11-01718-s008.mol
  corina  04151403583D 1   1.00000     0.00000 
CORINA 3.49 0023  12.04.2013
 14 15  0  0  0  0  0  0  0  0999 V2000
   -0.0167    1.3832    0.0096 C   0  0  0  0  0  0  0  0  0  0  0  0
    0.0021   -0.0041    0.0020 C   0  0  0  0  0  0  0  0  0  0  0  0
    1.2106   -0.6933   -0.0104 C   0  0  0  0  0  0  0  0  0  0  0  0
    2.3998   -0.0158   -0.0158 C   0  0  0  0  0  0  0  0  0  0  0  0
    2.3943    1.3836   -0.0141 C   0  0  0  0  0  0  0  0  0  0  0  0
    1.1764    2.0854    0.0020 C   0  0  0  0  0  0  0  0  0  0  0  0
    3.6854   -0.7976   -0.0168 C   0  0  0  0  0  0  0  0  0  0  0  0
    4.8386    0.0366   -0.5679 C   0  0  0  0  0  0  0  0  0  0  0  0
    4.9372    1.3507    0.2179 C   0  0  0  0  0  0  0  0  0  0  0  0
    3.6613    2.1267   -0.0344 C   0  0  0  0  0  0  0  0  0  0  0  0
    3.6849    3.3211   -0.2465 O   0  0  0  0  0  0  0  0  0  0  0  0
    1.1703    3.4414    0.0105 O   0  0  0  0  0  0  0  0  0  0  0  0
   -1.1664   -0.6935    0.0071 O   0  0  0  0  0  0  0  0  0  0  0  0
    6.0606   -0.6919   -0.4335 O   0  0  0  0  0  0  0  0  0  0  0  0
  1  2  2  0      
  2  3  1  0      
  3  4  2  0      
  4  5  1  0      
  5  6  2  0      
  6  1  1  0      
  4  7  1  0      
  7  8  1  0      
  8  9  1  0      
  9 10  1  0      
 10  5  1  0      
 10 11  2  0      
  6 12  1  0      
  2 13  1  0      
  8 14  1  4      
M  END
$$$$
