# Supplementary material for: Polyketides from a Marine-Derived Fungus Xylariaceae sp
Source: MDPI journal article supplement (doi:10.3390/md11051718), 2013-05-21
Supplement: s17 [file s17]

marinedrugs-11-01718-s008.mol
  ChemDraw02251409382D

 14 15  0  0  0  0  0  0  0  0999 V2000
   -1.4945    0.0854    0.0000 C   0  0  0  0  0  0  0  0  0  0  0  0
   -1.4945   -0.7396    0.0000 C   0  0  0  0  0  0  0  0  0  0  0  0
   -0.7800   -1.1521    0.0000 C   0  0  0  0  0  0  0  0  0  0  0  0
   -0.0656   -0.7396    0.0000 C   0  0  0  0  0  0  0  0  0  0  0  0
   -0.0656    0.0854    0.0000 C   0  0  0  0  0  0  0  0  0  0  0  0
   -0.7800    0.4979    0.0000 C   0  0  0  0  0  0  0  0  0  0  0  0
    0.6489   -1.1521    0.0000 C   0  0  0  0  0  0  0  0  0  0  0  0
    1.3634   -0.7396    0.0000 C   0  0  0  0  0  0  0  0  0  0  0  0
    1.3634    0.0854    0.0000 C   0  0  0  0  0  0  0  0  0  0  0  0
    0.6489    0.4979    0.0000 C   0  0  0  0  0  0  0  0  0  0  0  0
    0.6489    1.3229    0.0000 O   0  0  0  0  0  0  0  0  0  0  0  0
   -0.7800    1.3229    0.0000 O   0  0  0  0  0  0  0  0  0  0  0  0
   -2.0779   -1.3229    0.0000 O   0  0  0  0  0  0  0  0  0  0  0  0
    2.0779   -1.1521    0.0000 O   0  0  0  0  0  0  0  0  0  0  0  0
  1  2  2  0      
  2  3  1  0      
  3  4  2  0      
  4  5  1  0      
  5  6  2  0      
  6  1  1  0      
  4  7  1  0      
  7  8  1  0      
  8  9  1  0      
  9 10  1  0      
 10  5  1  0      
 10 11  2  0      
  6 12  1  0      
  2 13  1  0      
  8 14  1  4      
M  END
