# Supplementary material for: Polyketides from a Marine-Derived Fungus Xylariaceae sp
Source: MDPI journal article supplement (doi:10.3390/md11051718), 2013-05-21
Supplement: s18 [file s18]

marinedrugs-11-01718-s009.mol
  corina  04151403583D 1   1.00000     0.00000 
CORINA 3.49 0023  12.04.2013
 15 16  0  0  0  0  0  0  0  0999 V2000
   -0.0167    1.3787    0.0096 C   0  0  0  0  0  0  0  0  0  0  0  0
    0.0021   -0.0041    0.0020 C   0  0  0  0  0  0  0  0  0  0  0  0
    1.2079   -0.6905   -0.0157 C   0  0  0  0  0  0  0  0  0  0  0  0
    2.4083    0.0058   -0.0261 C   0  0  0  0  0  0  0  0  0  0  0  0
    2.3869    1.4010   -0.0136 C   0  0  0  0  0  0  0  0  0  0  0  0
    1.1683    2.0852    0.0021 C   0  0  0  0  0  0  0  0  0  0  0  0
    3.7008   -0.7629   -0.0573 C   0  0  0  0  0  0  0  0  0  0  0  0
    4.8567    0.0759    0.4808 C   0  0  0  0  0  0  0  0  0  0  0  0
    4.9305    1.3981   -0.2940 C   0  0  0  0  0  0  0  0  0  0  0  0
    3.6526    2.1606   -0.0111 C   0  0  0  0  0  0  0  0  0  0  0  0
    3.6687    3.3528    0.2091 O   0  0  0  0  0  0  0  0  0  0  0  0
    3.5648   -1.9399    0.7417 O   0  0  0  0  0  0  0  0  0  0  0  0
    1.1543    3.1651    0.0087 H   0  0  0  0  0  0  0  0  0  0  0  0
    1.2134   -2.0496   -0.0224 O   0  0  0  0  0  0  0  0  0  0  0  0
   -0.0572   -2.7035   -0.0104 C   0  0  0  0  0  0  0  0  0  0  0  0
  1  2  2  0      
  2  3  1  0      
  3  4  2  0      
  4  5  1  0      
  5  6  2  0      
  6  1  1  0      
  4  7  1  0      
  7  8  1  0      
  8  9  1  0      
  9 10  1  0      
 10  5  1  0      
 10 11  2  0      
  7 12  1  0      
  6 13  1  0      
  3 14  1  0      
 14 15  1  0      
M  STY  1   1 SUP
M  SLB  1   1   1
M  SAL   1  2  14  15
M  SBL   1  1  15
M  SMT   1 OMe
M  SBV   1 15   -7.3285    5.8163
M  END
$$$$
