# Supplementary material for: Polyketides from a Marine-Derived Fungus Xylariaceae sp
Source: MDPI journal article supplement (doi:10.3390/md11051718), 2013-05-21
Supplement: s19 [file s19]

marinedrugs-11-01718-s009.mol
  ChemDraw02251409382D

 15 16  0  0  0  0  0  0  0  0999 V2000
   -1.4289    0.4125    0.0000 C   0  0  0  0  0  0  0  0  0  0  0  0
   -1.4289   -0.4125    0.0000 C   0  0  0  0  0  0  0  0  0  0  0  0
   -0.7145   -0.8250    0.0000 C   0  0  0  0  0  0  0  0  0  0  0  0
    0.0000   -0.4125    0.0000 C   0  0  0  0  0  0  0  0  0  0  0  0
    0.0000    0.4125    0.0000 C   0  0  0  0  0  0  0  0  0  0  0  0
   -0.7145    0.8250    0.0000 C   0  0  0  0  0  0  0  0  0  0  0  0
    0.7145   -0.8250    0.0000 C   0  0  0  0  0  0  0  0  0  0  0  0
    1.4289   -0.4125    0.0000 C   0  0  0  0  0  0  0  0  0  0  0  0
    1.4289    0.4125    0.0000 C   0  0  0  0  0  0  0  0  0  0  0  0
    0.7145    0.8250    0.0000 C   0  0  0  0  0  0  0  0  0  0  0  0
    0.7145    1.6500    0.0000 O   0  0  0  0  0  0  0  0  0  0  0  0
    0.7145   -1.6500    0.0000 O   0  0  0  0  0  0  0  0  0  0  0  0
   -0.7145    1.6500    0.0000 H   0  0  0  0  0  0  0  0  0  0  0  0
   -0.3572   -1.0312    0.0000 O   0  0  0  0  0  0  0  0  0  0  0  0
    0.3572   -1.4437    0.0000 C   0  0  0  0  0  0  0  0  0  0  0  0
  1  2  2  0      
  2  3  1  0      
  3  4  2  0      
  4  5  1  0      
  5  6  2  0      
  6  1  1  0      
  4  7  1  0      
  7  8  1  0      
  8  9  1  0      
  9 10  1  0      
 10  5  1  0      
 10 11  2  0      
  7 12  1  1      
  6 13  1  0      
  3 14  1  0      
 14 15  1  0      
M  STY  1   1 SUP
M  SLB  1   1   1
M  SAL   1  2  14  15
M  SBL   1  1  15
M  SMT   1 OMe
M  SBV   1 15   -7.3285    5.8163
M  END
