# Supplementary material for: Polyketides from a Marine-Derived Fungus Xylariaceae sp
Source: MDPI journal article supplement (doi:10.3390/md11051718), 2013-05-21
Supplement: s20 [file s20]

marinedrugs-11-01718-s010.mol
  corina  04151403583D 1   1.00000     0.00000 
CORINA 3.49 0023  12.04.2013
 14 15  0  0  0  0  0  0  0  0999 V2000
   -0.0166    1.3763    0.0096 C   0  0  0  0  0  0  0  0  0  0  0  0
    0.0021   -0.0041    0.0020 C   0  0  0  0  0  0  0  0  0  0  0  0
    1.2035   -0.6929   -0.0108 C   0  0  0  0  0  0  0  0  0  0  0  0
    2.4036   -0.0098   -0.0163 C   0  0  0  0  0  0  0  0  0  0  0  0
    2.3951    1.3877   -0.0142 C   0  0  0  0  0  0  0  0  0  0  0  0
    1.1766    2.0839    0.0020 C   0  0  0  0  0  0  0  0  0  0  0  0
    3.6900   -0.7895   -0.0181 C   0  0  0  0  0  0  0  0  0  0  0  0
    4.8420    0.0461   -0.5696 C   0  0  0  0  0  0  0  0  0  0  0  0
    4.9402    1.3600    0.2164 C   0  0  0  0  0  0  0  0  0  0  0  0
    3.6631    2.1348   -0.0344 C   0  0  0  0  0  0  0  0  0  0  0  0
    3.6846    3.3291   -0.2450 O   0  0  0  0  0  0  0  0  0  0  0  0
    3.9984   -1.1871    1.3195 O   0  0  0  0  0  0  0  0  0  0  0  0
    1.1657    3.4398    0.0102 O   0  0  0  0  0  0  0  0  0  0  0  0
    6.0648   -0.6814   -0.4367 O   0  0  0  0  0  0  0  0  0  0  0  0
  1  2  2  0      
  2  3  1  0      
  3  4  2  0      
  4  5  1  0      
  5  6  2  0      
  6  1  1  0      
  4  7  1  0      
  7  8  1  0      
  8  9  1  0      
  9 10  1  0      
 10  5  1  0      
 10 11  2  0      
  7 12  1  0      
  6 13  1  0      
  8 14  1  0      
M  END
$$$$
