# Supplementary material for: Polyketides from a Marine-Derived Fungus Xylariaceae sp
Source: MDPI journal article supplement (doi:10.3390/md11051718), 2013-05-21
Supplement: s21 [file s21]

marinedrugs-11-01718-s010.mol
  ChemDraw02251409392D

 14 15  0  0  0  0  0  0  0  0999 V2000
   -1.7862    0.4125    0.0000 C   0  0  0  0  0  0  0  0  0  0  0  0
   -1.7862   -0.4125    0.0000 C   0  0  0  0  0  0  0  0  0  0  0  0
   -1.0717   -0.8250    0.0000 C   0  0  0  0  0  0  0  0  0  0  0  0
   -0.3572   -0.4125    0.0000 C   0  0  0  0  0  0  0  0  0  0  0  0
   -0.3572    0.4125    0.0000 C   0  0  0  0  0  0  0  0  0  0  0  0
   -1.0717    0.8250    0.0000 C   0  0  0  0  0  0  0  0  0  0  0  0
    0.3572   -0.8250    0.0000 C   0  0  0  0  0  0  0  0  0  0  0  0
    1.0717   -0.4125    0.0000 C   0  0  0  0  0  0  0  0  0  0  0  0
    1.0717    0.4125    0.0000 C   0  0  0  0  0  0  0  0  0  0  0  0
    0.3572    0.8250    0.0000 C   0  0  0  0  0  0  0  0  0  0  0  0
    0.3572    1.6500    0.0000 O   0  0  0  0  0  0  0  0  0  0  0  0
    0.3572   -1.6500    0.0000 O   0  0  0  0  0  0  0  0  0  0  0  0
   -1.0717    1.6500    0.0000 O   0  0  0  0  0  0  0  0  0  0  0  0
    1.7862   -0.8250    0.0000 O   0  0  0  0  0  0  0  0  0  0  0  0
  1  2  2  0      
  2  3  1  0      
  3  4  2  0      
  4  5  1  0      
  5  6  2  0      
  6  1  1  0      
  4  7  1  0      
  7  8  1  0      
  8  9  1  0      
  9 10  1  0      
 10  5  1  0      
 10 11  2  0      
  7 12  1  1      
  6 13  1  0      
  8 14  1  1      
M  END
