# Supplementary material for: Polyketides from a Marine-Derived Fungus Xylariaceae sp
Source: MDPI journal article supplement (doi:10.3390/md11051718), 2013-05-21
Supplement: s22 [file s22]

marinedrugs-11-01718-s011.mol
  corina  04151403583D 1   1.00000     0.00000 
CORINA 3.49 0023  12.04.2013
 14 15  0  0  0  0  0  0  0  0999 V2000
   -0.0500    1.7676   -0.5540 C   0  0  0  0  0  0  0  0  0  0  0  0
   -0.1707    0.3907   -0.5990 C   0  0  0  0  0  0  0  0  0  0  0  0
    0.9470   -0.4053   -0.4556 C   0  0  0  0  0  0  0  0  0  0  0  0
    2.2007    0.1824   -0.2648 C   0  0  0  0  0  0  0  0  0  0  0  0
    2.3255    1.5716   -0.2229 C   0  0  0  0  0  0  0  0  0  0  0  0
    1.1915    2.3585   -0.3667 C   0  0  0  0  0  0  0  0  0  0  0  0
    3.3926   -0.6730   -0.1019 C   0  0  0  0  0  0  0  0  0  0  0  0
    4.7507   -0.0051   -0.1622 C   0  0  0  0  0  0  0  0  0  0  0  0
    4.6567    1.2985    0.6417 C   0  0  0  0  0  0  0  0  0  0  0  0
    3.6603    2.2381   -0.0320 C   0  0  0  0  0  0  0  0  0  0  0  0
    3.4907    3.4012    0.7807 O   0  0  0  0  0  0  0  0  0  0  0  0
    1.2973    3.7128   -0.3244 O   0  0  0  0  0  0  0  0  0  0  0  0
    3.2881   -1.8681    0.0745 O   0  0  0  0  0  0  0  0  0  0  0  0
    4.2159    1.0088    1.9698 O   0  0  0  0  0  0  0  0  0  0  0  0
  1  2  2  0      
  2  3  1  0      
  3  4  2  0      
  4  5  1  0      
  5  6  2  0      
  6  1  1  0      
  4  7  1  0      
  7  8  1  0      
  8  9  1  0      
  9 10  1  0      
 10  5  1  0      
  6 12  1  0      
 10 11  1  0      
  7 13  2  0      
  9 14  1  0      
M  END
$$$$
