# Supplementary material for: Polyketides from a Marine-Derived Fungus Xylariaceae sp
Source: MDPI journal article supplement (doi:10.3390/md11051718), 2013-05-21
Supplement: s23 [file s23]

marinedrugs-11-01718-s011.mol
  ChemDraw02251409392D

 14 15  0  0  0  0  0  0  0  0999 V2000
   -1.7206    0.4125    0.0000 C   0  0  0  0  0  0  0  0  0  0  0  0
   -1.7206   -0.4125    0.0000 C   0  0  0  0  0  0  0  0  0  0  0  0
   -1.0062   -0.8250    0.0000 C   0  0  0  0  0  0  0  0  0  0  0  0
   -0.2917   -0.4125    0.0000 C   0  0  0  0  0  0  0  0  0  0  0  0
   -0.2917    0.4125    0.0000 C   0  0  0  0  0  0  0  0  0  0  0  0
   -1.0062    0.8250    0.0000 C   0  0  0  0  0  0  0  0  0  0  0  0
    0.4228   -0.8250    0.0000 C   0  0  0  0  0  0  0  0  0  0  0  0
    1.1373   -0.4125    0.0000 C   0  0  0  0  0  0  0  0  0  0  0  0
    1.1373    0.4125    0.0000 C   0  0  0  0  0  0  0  0  0  0  0  0
    0.4228    0.8250    0.0000 C   0  0  0  0  0  0  0  0  0  0  0  0
    0.4228    1.6500    0.0000 O   0  0  0  0  0  0  0  0  0  0  0  0
   -1.0062    1.6500    0.0000 O   0  0  0  0  0  0  0  0  0  0  0  0
    0.4228   -1.6500    0.0000 O   0  0  0  0  0  0  0  0  0  0  0  0
    1.7206    0.9959    0.0000 O   0  0  0  0  0  0  0  0  0  0  0  0
  1  2  2  0      
  2  3  1  0      
  3  4  2  0      
  4  5  1  0      
  5  6  2  0      
  6  1  1  0      
  4  7  1  0      
  7  8  1  0      
  8  9  1  0      
  9 10  1  0      
 10  5  1  0      
  6 12  1  0      
 10 11  1  1      
  7 13  2  0      
  9 14  1  1      
M  END
